# Supplementary material for: Small Sized EGFR1 and HER2 Specific Bifunctional Antibody for Targeted Cancer Therapy
Source: PubMed Central journal article supplement — Theranostics. 2015 Jan 21;5(4):378–98. doi: 10.7150/thno.10084 (PMC4329502; doi:10.7150/thno.10084), 2015-01-21
Supplement: thnov05p0378s1.pdf [file thnov05p0378s1.pdf]

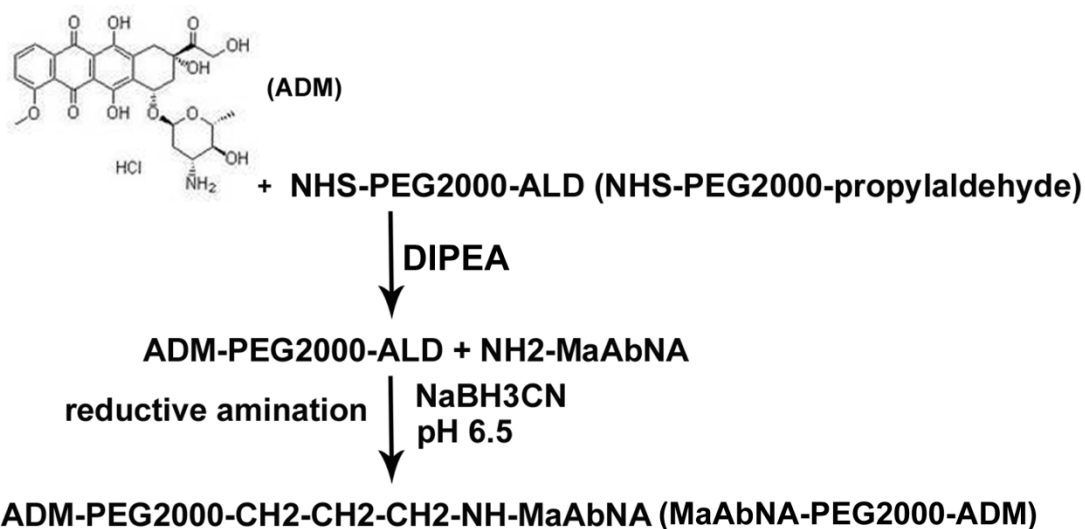

Supplementary Figure S1: Synthesize of MaAbNA-PEG2000-ADM.

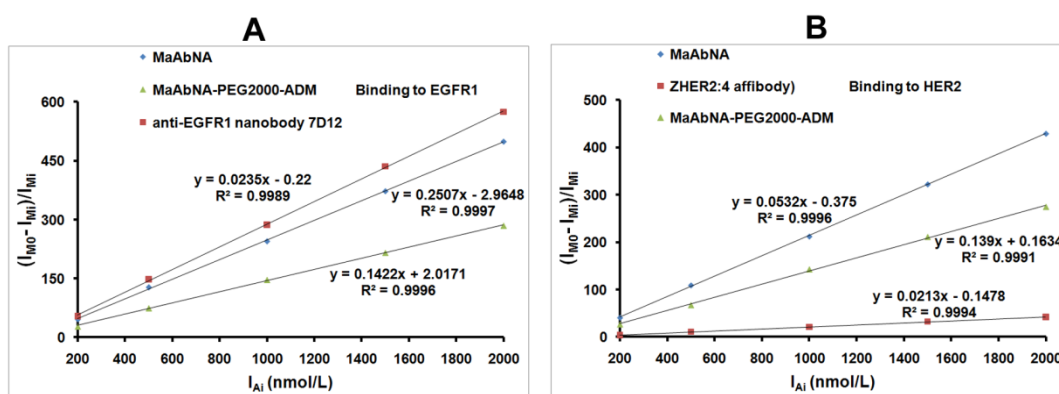

Supplementary Figure S2: Graphical representations of the liner relationship between  $(I_{M0} - I_{Mi})/I_{Mi}$  and increasing concentrations of EGFR1 (A) or HER2 (B) antigen ( $I_{Ai}$ = 0, 500, 1000, 1500 and 2000 nmol/L).  $I_{Mi}$  is the molar concentration of free antibodies with a combined antigen concentration of  $I_{Ai}$ , and  $I_{M0}$  is the molar concentration of free antibodies in the absence of antigen, and  $(I_{M0}-I_{Mi})$  represents the molar concentration of the antibody-antigen complex at equilibrium. Both  $I_{M0}$  and  $I_{Mi}$  were measured by competitive ELISA.

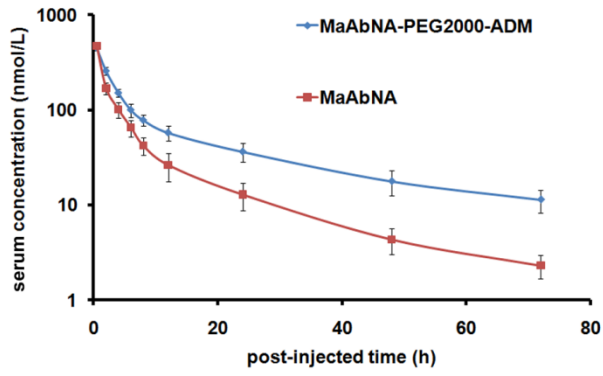

Supplementary Figure S3: The serum concentrations of MaAbNA and MaAbNA-PEG2000-ADM at different time points post intravenous injection to rats.
